# Supplementary material for: The personality trait of behavioral inhibition modulates perceptions of moral character and performance during the trust game: behavioral results and computational modeling
Source: PeerJ. 2016 Feb 8;4:e1631. doi: 10.7717/peerj.1631 (PMC4800786; doi:10.7717/peerj.1631)
Supplement: Supplemental Information 2 — Gender, age and score on the adult measure of behavioral inhibition for each participant with a summary of corresponding partner ratings and behavior in the trust game. [file peerj-04-1631-s002.xlsx]

## Sheet: data
Subject	Age	Gender	AMBI	high_BI	Good_Pre	Good_Post	Neutral_Pre	Neutral_Post	Bad_Pre	Bad_Post	Gkeep1	Bkeep1	Nkeep1	Gkeep2	Bkeep2	Nkeep2	Gkeep3	Bkeep3	Nkeep3	Gkeep4	Bkeep4	Nkeep4	GoodTot	NeutralTot	BadTot
S14_037	22	M	14	0	7	5	5	4	1	1	0	6	2	1	6	4	3	6	4	3	6	3	7	13	24
S14_029	21	M	13	0	7	5	6	5	3	1	0	6	1	0	6	0	0	6	0	0	6	0	0	1	24
S14_025	18	M	11	0	7	7	5	3	4	5	4	1	5	2	2	2	2	0	2	2	2	0	10	9	5
S14_021	22	M	12	0	7	6	5	3	3	2	2	6	6	4	4	2	4	6	6	4	6	6	14	20	22
S14_018	20	M	9	0	7	6	4	5	3	5	1	6	6	3	2	1	0	1	1	1	2	1	5	9	11
S14_013	21	M	12	0	7	4	3	3	1	4	0	0	6	0	0	6	0	0	6	0	0	6	0	24	0
S14_009	21	M	15	0	7	5	4	4	2	5	0	4	3	3	2	1	3	4	2	5	0	4	11	10	10
S14_005	20	M	14	0	6	2	4	4	3	5	2	2	2	4	4	4	4	3	2	3	2	4	13	12	11
S14_004	21	M	4	0	5	6	5	4	3	3	0	6	6	0	6	6	1	6	5	0	6	6	1	23	24
F13_082	20	M	9	0	6	5	5	6	1	2	2	5	2	0	6	0	0	6	0	0	6	0	2	2	23
F13_081	21	M	11	0	7	2	4	1	1	1	3	5	3	6	6	5	6	6	6	6	6	6	21	20	23
F13_075	26	M	15	0	5	2	4	1	4	4	0	1	3	2	2	4	4	4	6	5	3	6	11	19	10
F13_073	20	M	4	0	7	3	6	7	4	5	3	3	1	5	3	0	6	1	0	3	2	3	17	4	9
F13_072	18	M	9	0	6	1	5	5	1	6	3	3	3	3	3	4	5	2	3	5	3	4	16	14	11
F13_071	21	M	8	0	7	6	5	4	1	1	0	4	1	3	3	2	2	4	4	3	5	3	8	10	16
F13_058	20	M	15	0	7	5	6	4	1	1	1	3	3	3	6	5	3	6	2	1	6	3	8	13	21
F13_050	22	M	12	0	7	1	4	6	7	1	2	6	2	6	5	5	6	6	5	6	6	3	20	15	23
F13_049	18	M	13	0	7	4	4	4	3	4	1	1	0	0	0	0	0	0	0	0	0	0	1	0	1
F13_047	19	M	15	0	5	3	4	3	3	4	2	4	0	2	3	4	4	1	4	5	4	5	13	13	12
F13_046	19	M	15	0	7	4	2	3	2	3	3	5	5	6	5	4	6	6	6	5	5	5	20	20	21
F13_045	19	M	15	0	5	4	7	4	3	6	3	5	1	2	4	1	2	1	1	2	3	1	9	4	13
F13_044	19	M	13	0	7	5	4	3	2	2	2	6	5	5	5	6	4	6	6	5	6	5	16	22	23
F13_038	19	M	10	0	7	7	4	4	1	1	0	6	2	0	6	1	1	6	4	0	6	3	1	10	24
F13_036	19	M	14	0	5	4	5	5	2	4	2	2	2	4	0	0	5	1	1	5	3	3	16	6	6
F13_032	23	M	13	0	5	1	4	2	1	2	4	5	6	4	4	5	6	6	6	4	2	3	18	20	17
F13_031	18	M	6	0	7	3	4	6	1	1	0	5	1	2	6	0	3	4	0	6	6	1	11	2	21
F13_028	20	M	9	0	7	6	4	6	2	1	0	5	0	2	6	0	1	3	0	1	5	0	4	0	19
F13_024	19	M	13	0	6	2	4	4	1	4	0	4	1	0	1	0	3	3	1	4	2	1	7	3	10
F13_023	19	M	15	0	7	6	5	4	1	2	3	4	2	2	5	3	3	1	3	3	2	3	11	11	12
F13_019	18	M	5	0	7	7	4	4	2	2	0	5	3	4	3	4	5	4	3	3	6	2	12	12	18
F13_016	18	M	15	0	7	3	4	4	3	2	1	4	3	2	5	0	3	4	3	1	4	2	7	8	17
S14_019	20	F	13	0	7	3	4	6	1	2	4	5	0	5	6	0	3	4	4	4	6	3	16	7	21
S14_039	46	F	2	0	7	7	1	4	1	1	0	6	5	0	6	6	0	6	6	0	6	6	0	23	24
S14_035	18	F	13	0	7	6	1	3	1	4	0	4	3	0	2	3	0	0	0	0	0	0	0	6	6
S14_027	18	F	7	0	4	3	4	4	2	2	3	6	4	5	4	5	6	6	6	3	4	5	17	20	20
S14_020	.	F	12	0	5	5	5	5	5	4	0	0	0	0	0	0	0	0	0	0	0	0	0	0	0
S14_017	22	F	6	0	6	4	4	4	2	3	2	5	5	4	4	4	4	4	4	3	2	2	13	15	15
S14_016	21	F	10	0	4	5	3	4	5	3	1	5	1	0	5	0	1	5	0	0	5	0	2	1	20
S14_015	18	F	13	0	7	2	5	2	1	1	5	5	5	6	6	6	4	6	2	6	6	6	21	19	23
S14_006	33	F	7	0	7	5	4	4	2	2	0	5	2	0	6	6	0	6	6	1	6	3	1	17	23
S14_002	19	F	13	0	7	4	4	6	4	5	3	3	2	1	0	0	3	1	2	4	3	4	11	8	7
S14_001	34	F	13	0	7	4	7	6	1	4	2	2	0	3	2	0	2	2	2	3	2	1	10	3	8
F13_084	30	F	11	0	7	7	1	4	1	3	1	6	6	3	6	5	2	5	5	4	6	4	10	20	23
F13_080	19	F	13	0	7	6	4	6	1	2	0	6	6	1	5	3	3	4	5	2	4	4	6	18	19
F13_074	23	F	15	0	4	4	4	4	4	4	4	4	4	5	3	5	1	1	1	6	6	6	16	16	14
F13_069	19	F	12	0	7	6	5	5	3	4	2	3	3	2	4	2	2	2	5	4	2	1	10	11	11
F13_067	19	F	15	0	7	4	4	5	2	4	2	3	1	3	1	2	5	3	4	2	3	4	12	11	10
F13_063	33	F	8	0	7	4	3	4	4	4	0	0	0	0	0	0	0	0	0	0	0	0	0	0	0
F13_062	26	F	9	0	5	3	3	3	2	3	4	3	2	2	3	3	3	3	2	2	5	3	11	10	14
F13_057	18	F	9	0	7	6	5	6	1	2	0	5	1	0	6	0	0	5	1	0	6	0	0	2	22
F13_054	22	F	7	0	7	5	5	4	2	5	4	2	4	0	4	2	3	3	4	4	2	4	11	14	11
F13_052	20	F	9	0	7	1	4	2	1	3	3	4	1	5	3	2	6	5	4	6	4	4	20	11	16
F13_043	19	F	10	0	7	6	5	5	1	3	3	4	5	4	5	3	2	0	0	4	5	5	13	13	14
F13_042	22	F	10	0	5	3	4	3	4	4	1	3	3	4	3	5	5	6	5	5	5	4	15	17	17
F13_040	18	F	11	0	7	7	4	4	1	1	1	5	3	4	5	5	0	6	6	2	6	4	7	18	22
F13_039	22	F	5	0	7	7	4	3	1	1	0	6	1	0	6	2	0	6	0	0	6	0	0	3	24
F13_035	32	F	12	0	7	5	7	3	1	6	1	2	2	2	2	2	1	0	4	3	0	5	7	13	4
F13_027	18	F	10	0	7	5	4	5	2	4	1	6	1	1	6	1	3	6	2	1	6	1	6	5	24
F13_026	20	F	9	0	7	5	4	2	1	1	0	6	5	0	6	5	5	6	6	5	6	6	10	22	24
F13_022	19	F	10	0	7	4	5	6	3	5	0	3	1	3	2	3	1	1	4	2	4	2	6	10	10
F13_021	21	F	13	0	7	5	4	5	1	1	1	6	1	3	6	3	2	6	2	3	6	3	9	9	24
F13_018	19	F	10	0	5	2	3	2	2	2	4	4	4	2	4	4	4	3	4	4	4	3	14	15	15
F13_013	23	F	11	0	1	7	7	4	1	1	3	5	2	4	2	4	4	3	3	1	4	2	12	11	14
F13_011	28	F	11	0	5	3	3	2	2	2	2	4	3	4	3	4	4	5	4	6	5	5	16	16	17
F13_010	19	F	10	0	6	4	5	5	2	6	2	4	2	4	2	3	4	1	2	2	1	3	12	10	8
F13_009	19	F	13	0	3	3	3	1	2	1	0	6	6	0	6	6	0	6	6	0	6	6	0	24	24
F13_006	18	F	15	0	4	3	5	2	2	4	2	1	5	3	1	4	2	2	3	4	5	5	11	17	9
F13_005	18	F	9	0	3	1	2	1	1	1	1	2	2	1	1	0	2	1	3	2	2	1	6	6	6
F13_004	20	F	6	0	7	5	4	3	7	1	1	5	3	3	5	5	5	6	6	5	6	4	14	18	22
F13_001	18	F	10	0	7	7	4	4	1	1	1	5	1	0	6	0	0	6	0	0	6	0	1	1	23
S14_033	22	M	18	1	6	5	3	4	2	2	6	6	6	6	6	6	6	6	6	6	6	6	24	24	24
S14_031	21	M	24	1	6	4	3	6	1	5	1	6	6	5	4	4	3	3	4	3	3	0	12	14	16
S14_008	19	M	18	1	7	1	6	1	1	1	0	5	0	4	4	6	6	6	6	6	6	6	16	18	21
F13_077	22	M	19	1	3	7	1	1	2	1	1	4	5	5	6	5	6	6	6	6	6	6	18	22	22
F13_065	20	M	16	1	7	4	5	4	1	1	2	2	3	4	5	5	5	4	5	6	6	6	17	19	17
F13_048	19	M	17	1	7	6	4	3	2	3	2	6	3	0	6	5	0	6	5	0	6	6	2	19	24
F13_030	26	M	23	1	7	2	5	4	1	2	1	4	3	5	1	3	1	3	3	1	3	3	8	12	11
F13_025	25	M	25	1	7	7	4	4	1	1	0	6	5	0	6	6	0	6	6	0	6	6	0	23	24
F13_012	18	M	17	1	5	5	4	3	3	3	1	4	3	0	6	3	1	5	4	1	3	3	3	13	18
S14_041	19	F	20	1	6	4	3	4	1	1	2	6	4	5	5	5	5	6	5	5	6	6	17	20	23
S14_023	20	F	16	1	7	3	4	5	3	2	3	3	1	4	4	1	3	5	0	4	3	2	14	4	15
S14_014	18	F	18	1	7	7	5	6	1	1	0	6	2	0	6	3	0	6	0	0	6	1	0	6	24
S14_012	18	F	17	1	5	4	3	3	2	4	2	4	2	2	2	2	3	2	2	2	4	3	9	9	12
S14_011	21	F	27	1	6	3	5	3	3	6	4	3	1	3	1	4	4	0	4	4	2	3	15	12	6
S14_010	18	F	20	1	5	3	4	4	2	3	2	4	2	3	4	4	3	2	4	2	6	5	10	15	16
S14_007	27	F	27	1	7	2	4	5	1	5	1	3	3	6	2	2	4	5	5	5	5	5	16	15	15
S14_003	18	F	17	1	7	4	3	5	1	4	2	2	4	2	2	2	3	2	3	4	4	3	11	12	10
F13_079	49	F	17	1	7	4	4	4	1	4	1	6	4	3	6	6	4	6	6	5	6	6	13	22	24
F13_078	23	F	17	1	5	3	4	4	3	4	2	2	1	5	3	2	5	1	5	6	3	0	18	8	9
F13_076	18	F	21	1	7	5	4	4	3	2	1	5	2	0	6	6	1	5	3	1	5	2	3	13	21
F13_070	23	F	16	1	7	1	3	1	1	1	2	6	2	5	6	5	3	6	4	5	6	6	15	17	24
F13_068	20	F	22	1	7	6	5	6	3	6	0	2	2	0	2	2	0	3	3	0	2	2	0	9	9
F13_066	33	F	18	1	7	7	4	4	1	1	0	6	6	0	6	6	0	6	6	1	6	6	1	24	24
F13_064	19	F	23	1	7	3	4	3	1	3	1	6	5	6	6	4	6	6	5	5	6	5	18	19	24
F13_061	18	F	28	1	4	1	1	1	2	1	0	6	6	1	6	6	1	6	6	2	6	6	4	24	24
F13_060	20	F	18	1	7	5	6	4	3	1	0	5	0	0	6	0	0	6	0	0	6	0	0	0	23
F13_059	19	F	21	1	7	7	4	4	2	2	0	6	6	0	6	6	0	6	6	0	6	6	0	24	24
F13_056	21	F	21	1	7	5	4	3	2	5	1	2	5	4	5	3	3	5	4	5	3	5	13	17	15
F13_055	22	F	16	1	6	4	4	4	2	5	1	4	4	5	2	4	4	0	5	5	0	4	15	17	6
F13_053	19	F	20	1	6	5	4	4	2	2	2	6	4	3	4	6	3	5	2	4	4	2	12	14	19
F13_051	24	F	16	1	7	5	4	3	1	3	3	5	5	5	5	6	6	6	5	6	5	6	20	22	21
F13_041	19	F	23	1	6	6	6	5	4	3	2	4	4	3	4	3	5	4	2	4	2	3	14	12	14
F13_037	19	F	16	1	6	4	6	2	2	6	2	3	3	4	1	4	2	4	1	5	3	3	13	11	11
F13_034	19	F	22	1	7	5	3	4	1	3	2	5	2	1	2	3	3	2	1	2	3	2	8	8	12
F13_033	21	F	19	1	5	5	4	4	2	3	4	4	2	6	4	2	4	1	2	5	4	5	19	11	13
F13_029	19	F	24	1	7	3	4	5	2	6	2	4	3	4	2	0	2	3	1	1	3	4	9	8	12
F13_020	19	F	22	1	7	4	6	4	5	5	0	6	6	0	5	6	1	5	6	4	6	5	5	23	22
F13_017	20	F	16	1	6	4	4	5	3	3	2	2	2	2	2	1	2	3	0	3	2	3	9	6	9
F13_015	18	F	30	1	7	2	5	1	3	5	4	2	5	5	0	6	5	3	6	5	3	6	19	23	8
F13_014	20	F	21	1	6	4	4	4	2	4	2	5	4	4	4	5	5	4	4	3	4	4	14	17	17
F13_008	27	F	21	1	6	6	4	4	2	2	1	1	1	3	2	3	1	2	3	2	2	2	7	9	7
F13_007	22	F	16	1	7	7	4	5	1	1	2	3	1	2	0	2	0	4	4	2	6	1	6	8	13
F13_003	19	F	21	1	7	3	4	4	3	1	3	6	1	0	5	0	4	5	4	4	6	2	11	7	22
F13_002	22	F	25	1	6	4	4	4	1	1	1	6	5	4	6	3	4	6	3	3	6	2	12	13	24

## Sheet: graphs
		Rating_Good_Pre	Rating_Good_Post	Rating_Neutral_Pre	Rating_Neutral_Post	Rating_Bad_Pre	Rating_Bad_Post	Good_Keep_Tot	Neutral_Keep_Tot	Bad_Keep_Tot
	Uninhibited
n	70	70	70	70	70	70	70	70	70	70
mean	10.8571	6.22857	4.37143	4.22857	3.94286	2.15714	2.85714	9.37143	11.5571	15.5571
SD	3.1773	1.27599	1.74598	1.22972	1.40275	1.40016	1.59969	6.1836	6.95042	7.17208
SEM	0.37976	0.15251	0.208685	0.14698	0.16766	0.167351	0.191199	0.739081	0.830734	0.857227
	Inhibited
n	44	44	44	44	44	44	44	44	44	44
mean	20.2045	6.34091	4.29545	4.06818	3.75	1.95455	2.90909	10.6818	14.6136	17.0227
SD	3.70781	0.938658	1.67859	1.08687	1.29624	0.963389	1.69566	6.47634	6.31063	6.10942
SEM	0.558974	0.141508	0.253056	0.163852	0.195415	0.145236	0.25563	0.976344	0.951363	0.92103
PRE RATING
		Good	Neutral	Bad
mean	Uninhibited	6.22857	4.22857	2.15714
mean	Inhibited	6.34091	4.06818	1.95455
SEM	Uninhibited	0.15251	0.14698	0.167351
SEM	Inhibited	0.141508	0.163852	0.145236
POST RATING
		Good	Neutral	Bad
mean	Uninhibited	4.37143	3.94286	2.85714
mean	Inhibited	4.29545	3.75	2.90909
SEM	Uninhibited	0.208685	0.16766	0.191199
SEM	Inhibited	0.253056	0.195415	0.25563
KEEP RESPONSES
		Good	Neutral	Bad
mean	Uninhibited	9.37143	11.5571	15.5571
mean	Inhibited	10.6818	14.6136	17.0227
SEM	Uninhibited	0.739081	0.830734	0.857227
SEM	Inhibited	0.976344	0.951363	0.92103
